# Supplementary material for: The Prevalence of Parent-Reported Autism Spectrum Disorder Among US Children
Source: Oxford University Press journal article supplement (doi:10.1542/peds.2017-4161), 2018-11-26
Supplement: peds_20174161supplementarydata.pdf [file peds_20174161supplementarydata.pdf]

## Supplemental Information

**SUPPLEMENTAL TABLE 4** Prevalence of EBDs Among Children Aged 3–17 Years With Parent-Reported Current ASD, United States, 2016

|                             | Current Autism ( <i>n</i> = 1131) |                   |     |
|-----------------------------|-----------------------------------|-------------------|-----|
|                             | <i>n</i>                          | Weighted Column % | SE  |
| EBDs <sup>a</sup>           |                                   |                   |     |
| Down syndrome               | 7                                 | 0.4               | 0.2 |
| Intellectual disability     | 192                               | 16.8              | 2.0 |
| ADHD                        | 521                               | 48.4              | 3.0 |
| Learning disability         | 616                               | 55.0              | 3.0 |
| Anxiety                     | 497                               | 39.5              | 2.9 |
| Depression                  | 161                               | 15.7              | 2.3 |
| Behavioral and/or conduct   | 652                               | 60.8              | 2.9 |
| Tourette syndrome           | 21                                | 1.8               | 0.6 |
| Developmental delay         | 702                               | 63.7              | 3.0 |
| Only autism (no EBDs)       | 84                                | 7.7               | 1.7 |
| At least 1 co-occurring EBD | 1036                              | 92.3              | 1.7 |

Data source: 2016 NSCH. Note: *n* = 11 are missing EBD status (from list above). Col, xxx.

<sup>a</sup> Categories are not mutually exclusive.
